# Supplementary material
Source: HighWire-hosted journal article supplement (https://www.qdcxjkg.com/highwire/filestream/113561/field_highwire_adjunct_files/0/13_Fick1934.pdf)
Supplement: 13_Fick1934.pdf [file 13_Fick1934.pdf]

Reference no. 13 of

Winkelmann A, Noack T: The Clara cell – a 'Third Reich eponym'? *Eur Respir J* 2010; 36: 722–727

Fick R: Letter to the Dean of the Medical Faculty, dated 2 December 1934. 1934. *Archive: Universitätsarchiv der Humboldt-Universität, Berlin. Signature: UK PA Rudolf Fick, Nr. 40, Bd. 3, p. 64.*

### Short comment by the authors:

We include a transcript of the handwritten letter (see below).

Rudolf Fick (1866–1939) was the Director of the Institute of Anatomy in Berlin from 1921 to 1934. He writes this letter in December 1934, after his retirement, to ask the Dean of the Medical Faculty to find a successor for him as he would no longer be able to continue as Acting Director. He stresses that the international reputation of the German science community should be considered when looking for a successor for the Chair of Anatomy. He explicitly deplors the plan to give the Chair of Anatomy in Leipzig to Max Clara, "a young lecturer [...] without scientific reputation, without any experience in teaching, [...] against the wishes of the experts, [...] to the greatest joy and derision of all enemies of our country". At the end of his letter, Fick explicitly avoids the "German" greeting, which would have been "*Heil Hitler*".

---

Med. Fakultät  
Berlin, eingeg. 3. XII. 34  
Tagb.-No. 1419

Berlin, 2. XII. 34.

Eure Spectabilität, hochverehrter Herr Dekan!

Um der Fakultät u. dem Ministerium Schwierigkeiten zu ersparen und eine "Zwischenregierung" mit allen ihren Nachteilen für die Anstalt u. die Studenten vermeiden zu können, möchte ich schon heute mitteilen, dass ich die Vertretung des anatomischen Lehrstuhls und der Anstalt keinesfalls mehr im nächsten Sommer fortführen kann. Ich bitte daher das Ministerium darum zu ersuchen, zum Sommerhalbjahr einen Nachfolger für mich zu berufen.

Mit dieser Bitte möchte ich das dringende Ansuchen verbinden, beim Ministerium in ernstester Weise dahin vorstellig zu werden, den Berliner, also den ersten anatomischen Lehrstuhl des Deutschen Reiches mit einem erfahrenen Anatomeleiter von anerkanntem Gelehrtenruf zu besetzen, da bei den Berufungen an grosse Universitäten das Ansehen der Hochschulen des Reiches auf dem Spiele steht. Dies Ansehen war ja bisher einer der ganz wenigen und daher ungemein wichtigen Werte, über die wir für unsere Weltgeltung noch verfügten. Wehe, wenn hervorragende Lehrstühle nicht mit Männern von anerkanntem Ruf in der wissenschaftlichen Welt besetzt werden. Dadurch würde unserer Weltgeltung schwerster Schaden zugefügt.

Leider ist ja z.B. in Leipzig, wie mir Herr Kollege Held mitteilt, für Helds Nachfolge Herr Dr. Clara ein junger südtiroler Dozent der Histologie in ernsteste Aussicht genommen ohne jeden wissenschaftlichen Ruf, ohne jede Lehrerfahrung, der ausser als Student niemals auf dem Präpariersaal tätig, geschweige denn leitend tätig war, gegen den Willen der Sachverständigen für den Lehrstuhl eines E.H. Weber, W. His d.Aelt. u. H. Held, zur grössten Freude und zum Spott aller Feinde unseres Staates!

Durch dieses Vorkommnis mit tiefer Sorge erfüllt kann ich nicht mit deutschen, sondern muss mit den ernsten römischen Worten schliessen: Caveant consules dixi et salvavi animam meam.

Eurer Spectabilität ergebenster  
R. Fick

Med. Fakultät

Berlin, Eingeg. 3. 11. 34

Tag: 14/19

Berlin 2. XII. 34

64

Eure Spezialität, hochverehrte Herr Dekan!

Um die Fakultät in dem Ministerium Schwierigkeiten zu ersparen und eine „Zwischenregierung“ mit allen ihren Nachteilen für die Anstalt zu vermeiden zu können, möchte ich schon heute mitteilen, dass ich die Vertretung des anatomischen Lehrstuhls in der Anstalt keinesfalls mehr im nächsten Sommer fortführen kann. Ich bitte daher das Ministerium darum zu ersuchen, zum Sommerhalbjahr einen Nachfolger für mich zu berufen.

Mit dieser Bitte möchte ich das dringende Ausuchen verbinden, beim Ministerium in ernstester Weise dahin vorstellig zu werden, den Berliner, also den ersten anatomischen Lehrstuhl des deutschen Reiches mit einem erfahrenen Anatomenleiter von anerkanntem Gelehrtenruf zu besetzen, da bei den Berühmungen an große Universitäten das Ansehen der Hochschulen des Reiches auf dem Spiele steht. Dies Ansehen war ja bisher eines der ganz wenigen und dabei ringemein wichtigen Werte, über die wir für unsere Weltgeltung noch verfügten. Wehe, wenn hervorragende Lehrstühle nicht mit Männern von anerkanntem Ruf in der wissenschaftlichen Welt besetzt werden. Dadurch würde unsere Weltgeltung schwerster Schaden zugefügt.

Sonder ist ja z. B. in Leipzig, wie uns Herr Kollege Held mitteilt,

für Hells Nachfolge Herr Dr. Clara ein junger tüchtiger  
Dozent der Histologie in ernstester Aussicht genommen  
ohne jeden wissenschaftlichen Ruf, ohne jede Lehrerfahrung,  
der außer als Student niemals auf dem Präparatssaal tätig,  
geschweige denn leitend tätig war, gegen den Willen der  
Sachverständigen für den Lehrstuhl eines E. H. Weber,  
W. H. v. Helt. u. H. Helt, zur grössten Freude und zum  
Spott aller Freunde unseres Staates!

Dieses Vorkommnis mit tiefer Sorge erfüllt  
kann ich nicht mit deutschen, sondern muss mit den  
ernsten römischen Worten addressen: *Caecum cursu  
Fisi et salvavi animam meam.*

Ihrer Spectabilität ergebener

R. Dick
